# Supplementary figures and images for: Large serological survey showing cocirculation of Ebola and Marburg viruses in Gabonese bat populations, and a high seroprevalence of both viruses in Rousettus aegyptiacus
Source: Springer Nature journal article supplement (doi:10.1186/1471-2334-9-159), 2009-09-28

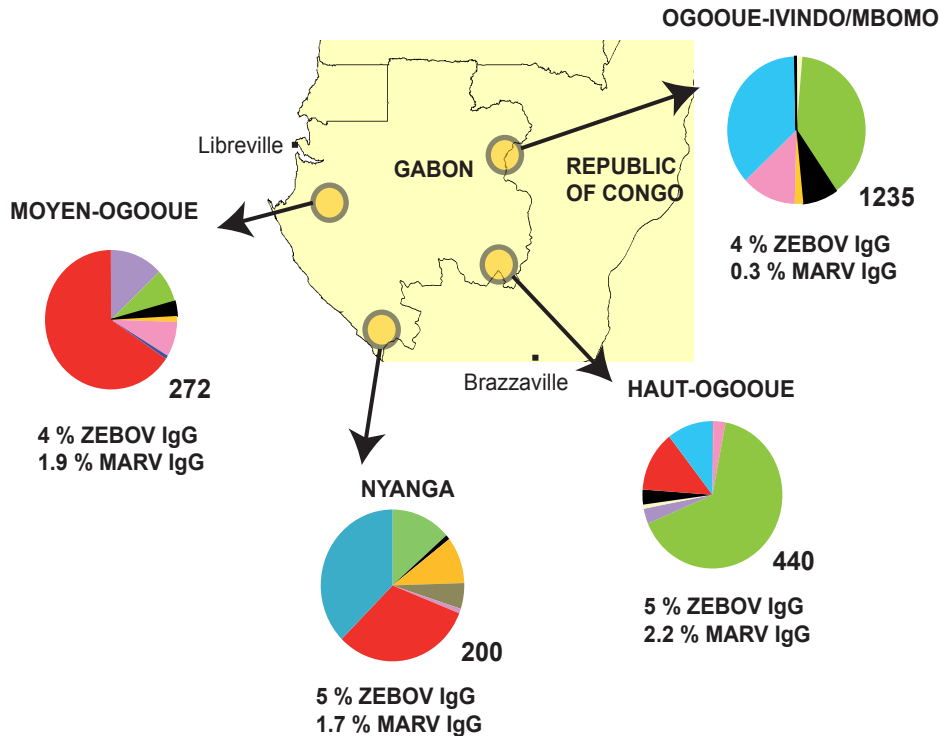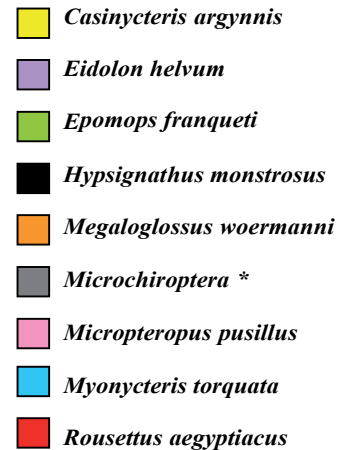

\* Including *Mops condylurus* and *Hipposideros gigas*

Supplement: 12879_2009_924_MOESM1_ESM.pdf [file 12879_2009_924_MOESM1_ESM.pdf]

# Ebola

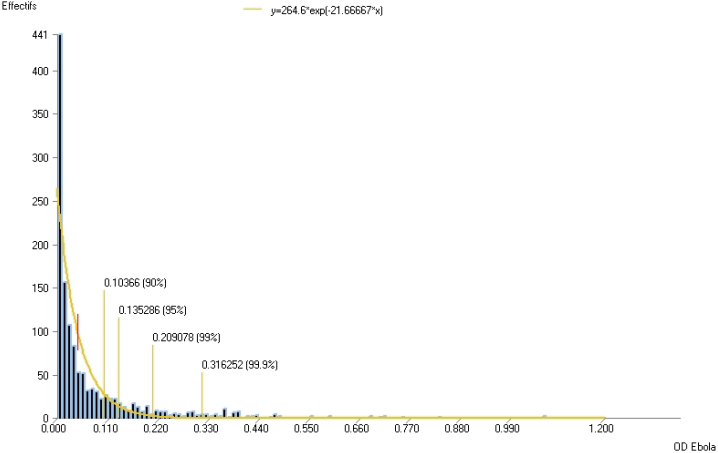

# Marburg

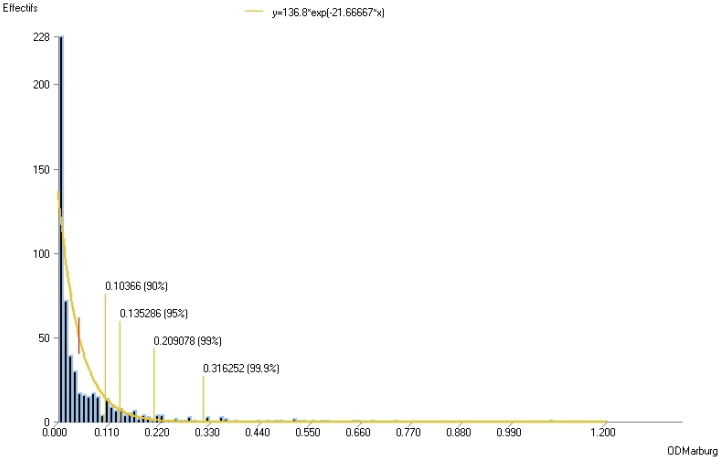

Supplement: 12879_2009_924_MOESM2_ESM.pdf [file 12879_2009_924_MOESM2_ESM.pdf]

## Ebola

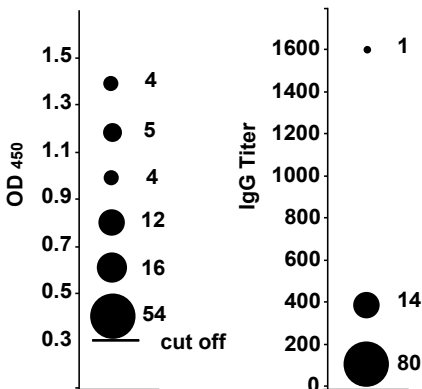

## Marburg

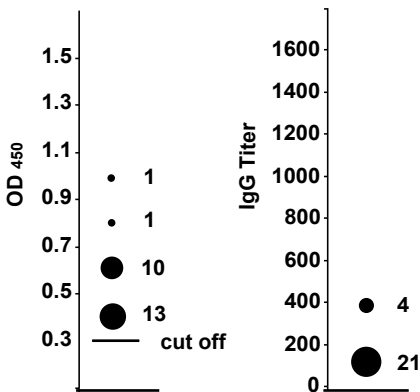

Supplement: 12879_2009_924_MOESM3_ESM.pdf [file 12879_2009_924_MOESM3_ESM.pdf]
